# Supplementary material
Source: publisher site journal article supplement (https://www.dovepress.com/article/603587)
Supplement: Supplementary file 1 [file 603587%20Supplementary%20Material.docx]

Supplementary Table 1. Instrumental variables for MR analysis of toothache and NAAG

| Exposure | Outcome | Sort | SNP | EA | OA | Beta | SE | pval | F-statistic |
| --- | --- | --- | --- | --- | --- | --- | --- | --- | --- |
| Toothache | NAAG | 1 | rs2807769 | C | T | 0.002 | 0.0005 | 0.400E-05 | 16 |
| Toothache | NAAG | 2 | rs143393054 | C | G | 0.003 | 0.0006 | 6.400E-07 | 25 |
| Toothache | NAAG | 3 | rs1971300 | T | G | -0.002 | 0.0004 | 6.600E-07 | 25 |
| Toothache | NAAG | 4 | rs13126192 | T | C | 0.002 | 0.0004 | 3.800E-06 | 25 |
| Toothache | NAAG | 5 | rs130413 | T | G | -0.003 | 0.0006 | 4.900E-06 | 25 |
| Toothache | NAAG | 6 | rs75386905 | G | A | 0.004 | 0.0008 | 1.900E-06 | 25 |
| Toothache | NAAG | 7 | rs17755239 | C | T | 0.003 | 0.0006 | 6.400E-07 | 25 |
| Toothache | NAAG | 8 | rs7868672 | G | A | 0.002 | 0.0004 | 5.700E-07 | 25 |
| Toothache | NAAG | 9 | rs545099 | T | C | 0.007 | 0.0015 | 3.000E-06 | 22 |
| Toothache | NAAG | 10 | rs12516437 | A | C | 0.002 | 0.0005 | 4.500E-06 | 16 |
| Toothache | NAAG | 11 | rs114409445 | A | G | 0.007 | 0.0014 | 3.100E-06 | 25 |
| Toothache | NAAG | 12 | rs9590748 | T | C | 0.002 | 0.0005 | 1.400E-06 | 16 |
| Toothache | NAAG | 13 | rs11842434 | C | T | 0.002 | 0.0004 | 1.700E-06 | 25 |
| Toothache | NAAG | 14 | rs73906929 | G | T | 0.005 | 0.0011 | 0.200E-05 | 21 |

NAAG, N-acetylglucosylglutamate; EA, effect_allele; OA, other_allele; SE, standard error

Note: The vertical order of SNPs in this table perfectly mirrors the top-to-bottom sequence of the data points in the leave-one-out plots (Figure 2).

Supplementary Table 2. Instrumental variables for MR analysis of NAAG and CD33

| Exposure | Outcome | Sort | SNP | EA | OA | Beta | SE | pval | F |
| --- | --- | --- | --- | --- | --- | --- | --- | --- | --- |
| NAAG | CD33 (1) | 1 | rs12363672 | C | A | 0.350 | 0.0496 | 1.661E-12 | 50 |
| NAAG | CD33 (1) | 2 | rs78529890 | A | G | 0.439 | 0.0513 | 1.153E-17 | 73 |
| NAAG | CD33 (1) | 3 | rs56316218 | G | T | 0.346 | 0.0184 | 2.913E-79 | 354 |
| NAAG | CD33 (1) | 4 | rs7107985 | A | C | 0.167 | 0.0259 | 1.286E-10 | 42 |
| NAAG | CD33 (1) | 5 | rs72907375 | A | G | 0.332 | 0.0533 | 4.440E-10 | 39 |
| NAAG | CD33 (1) | 6 | rs117557190 | T | C | 0.709 | 0.0581 | 3.175E-34 | 149 |
| NAAG | CD33 (1) | 7 | rs143149249 | T | C | 0.335 | 0.0557 | 1.789E-09 | 36 |
| NAAG | CD33 (1) | 8 | rs10896993 | G | A | 0.244 | 0.0163 | 2.444E-50 | 224 |
| NAAG | CD33 (1) | 9 | rs72919599 | T | C | 0.277 | 0.0346 | 1.073E-15 | 64 |
| NAAG | CD33 (1) | 10 | rs11039837 | T | C | 0.354 | 0.0531 | 2.682E-11 | 44 |
| NAAG | CD33 (1) | 11 | rs61882474 | A | G | 0.242 | 0.0433 | 2.197E-08 | 31 |
| NAAG | CD33 (1) | 12 | rs1783438 | T | C | 0.126 | 0.0159 | 2.450E-15 | 63 |
| NAAG | CD33 (1) | 13 | rs150857385 | G | A | 0.967 | 0.0684 | 2.604E-45 | 200 |
| NAAG | CD33 (1) | 14 | rs144885738 | T | C | 0.441 | 0.0718 | 8.164E-10 | 38 |
| NAAG | CD33 (1) | 15 | rs9667357 | C | T | 0.162 | 0.0275 | 3.759E-09 | 35 |
| NAAG | CD33 (1) | 16 | rs3974171 | A | C | 0.983 | 0.0327 | 3.887E-198 | 904 |
| NAAG | CD33 (1) | 17 | rs11039370 | T | C | 0.290 | 0.0215 | 1.923E-41 | 182 |
| NAAG | CD33 (1) | 18 | rs7119224 | C | T | -1.089 | 0.0342 | 1.000E-200 | 1014 |
| NAAG | CD33 (1) | 19 | rs595841 | A | G | 0.175 | 0.0175 | 1.260E-23 | 100 |
| NAAG | CD33 (1) | 20 | rs80310639 | C | T | 0.282 | 0.0314 | 2.634E-19 | 81 |
| NAAG | CD33 (1) | 21 | rs7948027 | C | T | 0.110 | 0.0165 | 2.551E-11 | 44 |
| NAAG | CD33 (1) | 22 | rs10838981 | C | T | 0.474 | 0.0150 | 1.000E-200 | 999 |
| NAAG | CD33 (1) | 23 | rs12577182 | C | T | 0.185 | 0.0235 | 3.273E-15 | 62 |
| NAAG | CD33 (1) | 24 | rs2867249 | C | T | 0.443 | 0.0154 | 5.001E-181 | 827 |
| NAAG | CD33 (1) | 25 | rs2853083 | A | G | 0.150 | 0.0161 | 1.311E-20 | 87 |
| NAAG | CD33 (1) | 26 | rs11518084 | T | C | 0.227 | 0.0290 | 4.718E-15 | 61 |
| NAAG | CD33 (1) | 27 | rs111679745 | A | C | 0.356 | 0.0430 | 1.174E-16 | 69 |
| NAAG | CD33 (1) | 28 | rs11228927 | T | C | 0.314 | 0.0265 | 2.087E-32 | 140 |
| NAAG | CD33 (1) | 29 | rs12575218 | A | G | 0.198 | 0.0236 | 5.756E-17 | 70 |
| NAAG | CD33 (1) | 30 | rs117217261 | A | G | 0.462 | 0.0560 | 1.540E-16 | 68 |
| NAAG | CD33 (1) | 31 | rs77950064 | A | C | -0.403 | 0.0251 | 5.704E-58 | 258 |
| NAAG | CD33 (1) | 32 | rs17512154 | C | T | 0.256 | 0.0290 | 8.990E-19 | 78 |
| NAAG | CD33 (1) | 33 | rs78054892 | C | T | 0.316 | 0.0456 | 4.677E-12 | 48 |
| NAAG | CD33 (1) | 34 | rs66470326 | G | A | 0.258 | 0.0465 | 2.695E-08 | 31 |
| NAAG | CD33 (1) | 35 | rs12226415 | G | A | -0.382 | 0.0244 | 3.109E-55 | 245 |
| NAAG | CD33 (1) | 36 | rs77377156 | C | T | 0.325 | 0.0353 | 3.754E-20 | 85 |
| NAAG | CD33 (1) | 37 | rs1783460 | A | G | 0.420 | 0.0716 | 4.331E-09 | 34 |
| NAAG | CD33 (1) | 38 | rs150268487 | C | G | 0.523 | 0.0704 | 1.147E-13 | 55 |
| NAAG | CD33 (1) | 39 | rs75647783 | T | C | 0.284 | 0.0286 | 3.178E-23 | 99 |
| NAAG | CD33 (1) | 40 | rs117537873 | C | A | 0.220 | 0.0382 | 8.117E-09 | 33 |
| NAAG | CD33 (1) | 41 | rs76257475 | A | G | 0.245 | 0.0394 | 4.839E-10 | 39 |
| NAAG | CD33 (1) | 42 | rs11245582 | T | G | 0.271 | 0.0267 | 3.640E-24 | 103 |
| NAAG | CD33 (1) | 43 | rs61897857 | A | G | 0.154 | 0.0189 | 2.694E-16 | 66 |
| NAAG | CD33 (1) | 44 | rs11227565 | C | T | 0.216 | 0.0246 | 2.070E-18 | 77 |
| NAAG | CD33 (1) | 45 | rs34402464 | T | A | 0.229 | 0.0344 | 2.725E-11 | 44 |
| NAAG | CD33 (1) | 46 | rs112112385 | A | G | -0.306 | 0.0514 | 2.673E-09 | 35 |
| NAAG | CD33 (2) | 1 | rs3729985 | G | C | 0.326 | 0.0490 | 2.791E-11 | 827 |
| NAAG | CD33 (2) | 2 | rs7102330 | T | G | 0.339 | 0.0515 | 4.438E-11 | 43 |
| NAAG | CD33 (2) | 3 | rs4647733 | C | G | -1.017 | 0.0692 | 7.205E-49 | 44 |
| NAAG | CD33 (2) | 4 | rs12363672 | C | A | 0.350 | 0.0496 | 1.661E-12 | 50 |
| NAAG | CD33 (2) | 5 | rs77547514 | C | T | 0.307 | 0.0524 | 4.362E-09 | 34 |
| NAAG | CD33 (2) | 6 | rs72907375 | A | G | 0.332 | 0.0533 | 4.440E-10 | 39 |
| NAAG | CD33 (2) | 7 | rs77377156 | C | T | 0.325 | 0.0353 | 3.754E-20 | 85 |
| NAAG | CD33 (2) | 8 | rs2291120 | C | T | 0.162 | 0.0243 | 2.561E-11 | 44 |
| NAAG | CD33 (2) | 9 | rs77214689 | A | G | 0.169 | 0.0323 | 1.738E-07 | 27 |
| NAAG | CD33 (2) | 10 | rs56316218 | G | T | 0.346 | 0.0184 | 2.913E-79 | 354 |
| NAAG | CD33 (2) | 11 | rs11608163 | G | T | 0.236 | 0.0468 | 4.641E-07 | 25 |
| NAAG | CD33 (2) | 12 | rs141151541 | T | A | 0.399 | 0.0533 | 6.451E-14 | 56 |
| NAAG | CD33 (2) | 13 | rs61884154 | A | G | 0.177 | 0.0289 | 9.028E-10 | 38 |
| NAAG | CD33 (2) | 14 | rs61732322 | G | A | 0.240 | 0.0367 | 6.090E-11 | 43 |
| NAAG | CD33 (2) | 15 | rs143149249 | T | C | 0.335 | 0.0557 | 1.789E-09 | 36 |
| NAAG | CD33 (2) | 16 | rs61895765 | A | G | 0.359 | 0.0401 | 3.764E-19 | 80 |
| NAAG | CD33 (2) | 17 | rs78054892 | C | T | 0.316 | 0.0456 | 4.677E-12 | 48 |
| NAAG | CD33 (2) | 18 | rs10838708 | A | G | 0.268 | 0.0156 | 1.394E-66 | 295 |
| NAAG | CD33 (2) | 19 | rs116916700 | A | G | 0.300 | 0.0368 | 3.831E-16 | 66 |
| NAAG | CD33 (2) | 20 | rs4519111 | T | G | 0.287 | 0.0188 | 2.159E-52 | 44 |
| NAAG | CD33 (2) | 21 | rs7107985 | A | C | 0.167 | 0.0259 | 1.286E-10 | 42 |
| NAAG | CD33 (2) | 22 | rs7948027 | C | T | 0.110 | 0.016 | 2.551E-11 | 47 |
| NAAG | CD33 (2) | 23 | rs12418229 | A | T | 0.211 | 0.0227 | 1.366E-20 | 86 |
| NAAG | CD33 (2) | 24 | rs150857385 | G | A | 0.967 | 0.0684 | 2.604E-45 | 200 |
| NAAG | CD33 (2) | 25 | rs143061150 | A | C | 0.353 | 0.0511 | 4.919E-12 | 48 |
| NAAG | CD33 (2) | 26 | rs7114704 | T | C | 0.208 | 0.0346 | 1.661E-09 | 36 |
| NAAG | CD33 (2) | 27 | rs1608275 | T | G | 0.282 | 0.0207 | 2.704E-42 | 186 |
| NAAG | CD33 (2) | 28 | rs148059562 | G | A | 0.338 | 0.0319 | 2.695E-26 | 112 |
| NAAG | CD33 (2) | 29 | rs595841 | A | G | 0.175 | 0.0175 | 1.260E-23 | 100 |
| NAAG | CD33 (2) | 30 | rs7117346 | A | G | 0.108 | 0.0200 | 7.720E-08 | 29 |
| NAAG | CD33 (2) | 31 | rs11518084 | T | C | 0.227 | 0.0290 | 4.718E-15 | 61 |
| NAAG | CD33 (2) | 32 | rs10838981 | C | T | 0.474 | 0.0150 | 1.000E-200 | 999 |
| NAAG | CD33 (2) | 33 | rs79570478 | A | T | 0.915 | 0.0586 | 7.144E-55 | 244 |
| NAAG | CD33 (2) | 34 | rs10896138 | A | G | 0.466 | 0.0198 | 4.719E-123 | 554 |
| NAAG | CD33 (2) | 35 | rs56259899 | A | C | -1.048 | 0.0320 | 1.000E-200 | 1073 |
| NAAG | CD33 (2) | 36 | rs61894388 | A | G | -1.012 | 0.0334 | 1.000E-200 | 918 |
| NAAG | CD33 (2) | 37 | rs3974171 | A | C | 0.983 | 0.0327 | 3.887E-198 | 36 |
| NAAG | CD33 (2) | 38 | rs79404237 | T | A | 0.372 | 0.0726 | 2.992E-07 | 26 |
| NAAG | CD33 (2) | 39 | rs7119224 | C | T | -1.089 | 0.0342 | 1.000E-200 | 1014 |
| NAAG | CD33 (2) | 40 | rs1943477 | T | C | 0.184 | 0.0354 | 1.952E-07 | 27 |
| NAAG | CD33 (2) | 41 | rs7942243 | G | C | 0.174 | 0.0169 | 7.869E-25 | 106 |
| NAAG | CD33 (2) | 42 | rs10431006 | G | A | 0.412 | 0.0270 | 2.297E-52 | 233 |
| NAAG | CD33 (2) | 43 | rs948847 | T | G | 0.121 | 0.0159 | 2.786E-14 | 58 |
| NAAG | CD33 (2) | 44 | rs183679522 | A | C | 0.238 | 0.0423 | 1.880E-08 | 32 |
| NAAG | CD33 (2) | 45 | rs12421608 | A | G | 0.208 | 0.0369 | 1.650E-08 | 32 |
| NAAG | CD33 (2) | 46 | rs12292353 | C | T | 0.445 | 0.0151 | 3.928E-190 | 868 |
| NAAG | CD33 (2) | 47 | rs2867249 | C | T | 0.443 | 0.0154 | 5.001E-181 | 827 |
| NAAG | CD33 (2) | 48 | rs34242224 | C | T | 0.174 | 0.0291 | 2.552E-09 | 36 |
| NAAG | CD33 (2) | 49 | rs2086561 | T | C | 0.290 | 0.0291 | 1.890E-23 | 99 |
| NAAG | CD33 (2) | 50 | rs61746002 | A | G | 0.264 | 0.0519 | 3.781E-07 | 26 |
| NAAG | CD33 (2) | 51 | rs10219245 | T | C | 0.486 | 0.01494 | 1.000E-200 | 1058 |
| NAAG | CD33 (2) | 52 | rs117205881 | T | C | 0.315 | 0.0235 | 4.351E-41 | 180 |
| NAAG | CD33 (2) | 53 | rs77323386 | A | G | 0.134 | 0.0240 | 2.639E-08 | 31 |
| NAAG | CD33 (2) | 54 | rs7941915 | G | C | 0.304 | 0.0391 | 7.457E-15 | 60 |
| NAAG | CD33 (2) | 55 | rs192424261 | T | A | 0.307 | 0.0313 | 8.804E-23 | 96 |
| NAAG | CD33 (2) | 56 | rs6485642 | C | T | -0.084 | 0.0166 | 4.276E-07 | 26 |
| NAAG | CD33 (2) | 57 | rs61904585 | G | T | 0.740 | 0.0391 | 5.345E-80 | 358 |
| NAAG | CD33 (2) | 58 | rs66470326 | G | A | 0.258 | 0.0465 | 2.695E-08 | 31 |
| NAAG | CD33 (2) | 59 | rs77893012 | T | C | 0.344 | 0.0526 | 6.563E-11 | 43 |
| NAAG | CD33 (2) | 60 | rs141309078 | G | A | 0.288 | 0.0265 | 1.171E-27 | 118 |
| NAAG | CD33 (2) | 61 | rs595329 | G | A | 0.180 | 0.0165 | 5.521E-28 | 119 |
| NAAG | CD33 (2) | 62 | rs117653193 | C | T | 0.273 | 0.0272 | 1.204E-23 | 101 |
| NAAG | CD33 (2) | 63 | rs10742797 | T | A | 0.155 | 0.0189 | 2.348E-16 | 67 |
| NAAG | CD33 (2) | 64 | rs61882474 | A | G | 0.242 | 0.0433 | 2.197E-08 | 31 |
| NAAG | CD33 (2) | 65 | rs1384657 | A | G | 0.177 | 0.0326 | 5.443E-08 | 29 |
| NAAG | CD33 (2) | 66 | rs11227565 | C | T | 0.216 | 0.0246 | 2.070E-18 | 77 |
| NAAG | CD33 (2) | 67 | rs71477492 | T | G | 0.187 | 0.0261 | 6.784E-13 | 51 |
| NAAG | CD33 (2) | 68 | rs117217261 | A | G | 0.462 | 0.0560 | 1.540E-16 | 68 |
| NAAG | CD33 (2) | 69 | rs139689864 | G | A | 0.276 | 0.0452 | 9.552E-10 | 37 |
| NAAG | CD33 (2) | 70 | rs34402464 | T | A | 0.229 | 0.0344 | 2.725E-11 | 44 |
| NAAG | CD33 (2) | 71 | rs144990988 | T | C | 0.273 | 0.0375 | 2.954E-13 | 53 |
| NAAG | CD33 (2) | 72 | rs118163355 | A | G | 0.204 | 0.0314 | 8.668E-11 | 42 |

NAAG, N-acetylglucosylglutamate; CD33 (1), CD33 on CD33dim HLA DR+ CD11b+; CD33 (2), CD33 on Monocytic Myeloid-Derived Suppressor Cells; EA, effect_allele; OA, other_allele; SE, standard error

Note: The vertical order of SNPs in this table perfectly mirrors the top-to-bottom sequence of the data points in the leave-one-out plots (Figure 2). This arrangement serves as the definitive reference for the omitted y-axis labels in the multi-panel figure.

Supplementary Table 3. Instrumental variables for MR analysis of CD33 and AD

| Exposure | Outcome | Sort | SNP | EA | OA | Beta | SE | pval | F |
| --- | --- | --- | --- | --- | --- | --- | --- | --- | --- |
| CD33 (1) | AD | 1 | rs11882720 | T | G | -0.448 | 0.0684 | 7.425E-11 | 43 |
| CD33 (1) | AD | 2 | rs7351079 | A | G | -0.390 | 0.0400 | 8.185E-22 | 95 |
| CD33 (1) | AD | 3 | rs3865444 | C | A | -1.139 | 0.0336 | 2.382E-191 | 1149 |
| CD33 (1) | AD | 4 | rs4802858 | T | C | -0.206 | 0.0361 | 1.326E-08 | 33 |
| CD33 (1) | AD | 5 | rs58483275 | C | T | 0.494 | 0.0713 | 6.182E-12 | 48 |
| CD33 (1) | AD | 6 | rs558625031 | G | A | -0.675 | 0.0812 | 2.007E-16 | 69 |
| CD33 (1) | AD | 7 | rs78949787 | C | T | 0.292 | 0.0357 | 5.834E-16 | 67 |
| CD33 (2) | AD | 1 | rs7351079 | G | A | -0.368 | 0.0423 | 9.034E-18 | 76 |
| CD33 (2) | AD | 2 | rs3865444 | A | C | -1.151 | 0.0388 | 1.714E-153 | 880 |
| CD33 (2) | AD | 3 | rs58301181 | G | C | -0.380 | 0.0672 | 1.940E-08 | 32 |
| CD33 (2) | AD | 4 | rs62114147 | T | C | 0.263 | 0.0372 | 2.563E-12 | 50 |

CD33 (1), CD33 on CD33dim HLA DR+ CD11b+; CD33 (2), CD33 on Monocytic Myeloid-Derived Suppressor Cells; AD, Alzheimer’s Disease; EA, effect_allele; OA, other_allele; SE, standard error

Note: The vertical order of SNPs in this table perfectly mirrors the top-to-bottom sequence of the data points in the leave-one-out plots (Figure 2).

**Supplementary Code:**
setwd('**')

options(ieugwasr_api = 'http://gwas-api.mrcieu.ac.uk/')

library(TwoSampleMR)

######Toothache-NAAG

exp_dat <- extract_instruments(outcomes = '**',

p1 = **,

clump = TRUE, r2 = **,

kb = **)

outcome='**'

outcomeFile='**'

out_dat=read_outcome_data(snps=exp_dat$SNP,

filename=outcomeFile, sep = "\t",

snp_col = "variant_id",

beta_col = "beta",

se_col = "standard_error",

effect_allele_col = "effect_allele",

other_allele_col = "other_allele",

pval_col = "p_value",

eaf_col = "effect_allele_frequency")

out_dat$outcome=outcome

exp_dat=exp_dat[exp_dat$SNP %in% out_dat$SNP,]

######NAAG-CD33

exp_dat <- read_exposure_data(

filename = '**',

sep= "\t",

snp_col = "variant_id",

beta_col = "beta",

se_col = "standard_error",

effect_allele_col ="effect_allele",

other_allele_col = "other_allele",

eaf_col = "effect_allele_frequency",

pval_col = "p_value"

)

exp_dat <- exp_dat[exp_dat$pval.exposure < **,]

exp_dat <- clump_data(exp_dat, clump_kb =**, clump_r2 =**, clump_p1 =**, pop = "**")

out_dat <- extract_outcome_data(

snps = exp_dat$SNP,

outcomes = '**'

)

######CD33-AD

exp_dat <- extract_instruments(outcomes = '**',

p1 = **,

clump = TRUE, r2 = **,

kb = **)

out_dat <- extract_outcome_data(snps = exp_dat$SNP, outcomes = '**')

dat <- harmonise_data(

exposure_dat = exp_dat,

outcome_dat = out_dat

)

dat$F <- with(dat, beta.exposure^2 / se.exposure^2)

dat <- subset(dat, F > 10)

res <- mr(dat)

res

OR <-generate_odds_ratios(res)

OR

library(MRPRESSO)

mr_presso(BetaOutcome ="beta.outcome", BetaExposure = "beta.exposure", SdOutcome ="se.outcome", SdExposure = "se.exposure",

OUTLIERtest = TRUE,DISTORTIONtest = TRUE, data = dat, NbDistribution = 1000,

SignifThreshold = 0.05)

het <- mr_heterogeneity(dat)

het

pleio <- mr_pleiotropy_test(dat)

pleio

single <- mr_leaveoneout(dat)

mr_leaveoneout_plot(single)

mr_scatter_plot(res,dat)

res_single <- mr_singlesnp(dat)

mr_forest_plot(res_single)

mr_funnel_plot(res_single)
